# Supplementary material for: The Paramecium histone chaperone Spt16-1 is required for Pgm endonuclease function in programmed genome rearrangements
Source: PubMed Central journal article supplement (PMC7402521; doi:10.1371/journal.pgen.1008949), 2020-07-23
Supplement: pgen.1008949.s002.pdf [file pgen.1008949.s002.pdf]

### Spt16N\_N Lobe

```
P.t._SPT16-1 1 -----MDKVOHALONKFKKNNKLAITLLEK-----ANQFDCAVLJGTSHSTNIGIQ-KGFQ
T.t._SPT16 1 -----MSKVKADLIFYOHKQLLSVWVK-----QPQYANIDAFITKNGK-DQGGNKIKTSATS
P.t._SPT16-2c 1 -----MDKKIADV-FQRHLDQLSRLND-----DLPATCILSCK-EDGSIKPKTKALF
P.t._SPT16-2a 1 -----MDKKIADV-FQRHLEQLVSRLE-----DVPATCILSCK-EDGSIKPKTKALF
P.t._SPT16-2b 1 -----MDKKIADV-FQRHLEQLVSRLE-----DLPATCILSCK-EDGSIKPKTKALF
A.t._SPT16 1 MADSRNGNARAPPSGVPPKAGNTYSIDVKN-FISRARALYEHWK--HS-ADLWGSADALATATPPASDILRYLKSSALN
S.p._Spt16 1 -----MAEYIDEIT-FHKRLGILLTSWNEEDG-KTLFQDCDSILVTVCAHDDTNPYQKSTALH
S.c._Spt16 1 -----MEELNIDFDW-FKRLTELKYSKNE-----FEGSPNSLLFVIGSSNANPNYQKTTILH
C.e._SPT16 1 -----MSGKRAVLNKKDLFFQRAERLYEHWEK--G-ADGLDSIKSLAFVYG--ETNPYTKTSALF
D.m._Dre4 1 -----MSSFVLDKDA-FVRRVKRLYEWAPSIGHDDALRNIDCTMSIVGV--EDDVMYKSMALQ
H.s._SPT16H 1 -----MAVTLDKDA-YRRVKRLYSNWRK--G-EDEYANVDATVVSIGV--DEEIVYAKSTALQ
M.m._Supt16 1 -----MAVTLDKDA-YRRVKRLYSNWRK--G-EDEYASLDATVVSIGV--DEEIVYAKSTALQ
```

### Spt16N\_N Lobe

```
P.t._SPT16-1 52 QWYLGCEIMDCILIMSTKMCILADEVMFOKLEK----SDIKMKTFTFFLLKNIKKNH---QQFQFALERLKEYP
T.t._SPT16 52 MWYFGDFDITILLITKKTFAICGNKKNMLKSVQ---EHAEAKEYNVFEKQDANNSQLQQLFEITDKDINKSS-
P.t._SPT16-2c 48 VWLFGYDMIEIVFATKKQIFYLASDKKLOMMEET----KQRLGGRYEVHFKYKQVADNRFS----FKLRQKIGN--
P.t._SPT16-2a 48 VWLFGYDMIEIVFATKKQIFYLASDKKLOMMEET----KQRLSCKFEVHFKYKQVADNRFS----FKLRQKIGN--
P.t._SPT16-2b 48 VWLFGYDMIEIVFATKKQIFYLASDKKLOMMEET----KHKLSCKFEVHFKYKQVADNRFS----FKLRQKIGN--
A.t._SPT16 77 IWLFGYEFPTIMVFTKROHFLCSRNKASLLEVV----KPKAHDELKLDVIMHVKPKGDD-GTGLMDAIFRAIRDLR
S.p._Spt16 59 TWLFGYEFPTLILLEKHRITILTSVKNANMLTKI----AETKGAADVNLKRTKDAEN--KKLFEKLIETIRATN-
S.c._Spt16 53 NWLFSYEFPATLIALVPGKVIITSSAKAKHLQKAIIDL--FKDPESKITELIWRNNKEPEL-NKKLFDVITLINSAG-
C.e._SPT16 56 TWLFGHEIADTVLLLLKDHIIYILGSRNKVEFFGSVTDG--NQSSGKVPVSTLIRDKTDKDA--GNFEKLIIDHILKSG-
D.m._Dre4 59 LWLFGYELTDTIMVFCDDRIIFMASKKKVEFLKQIANTKGNENANGAPATILLVREKKNESNK---SSFDKMLEAKESKN
H.s._SPT16H 54 TWLFGYELTDTIMVFCDDRIIFMASKKKVEFLKQIANTKGNENANGAPATILLVREKKNESNK---SSFDKMLEAKESKN
M.m._Supt16 54 TWLFGYELTDTIMVFCDDRIIFMASKKKVEFLKQIANTKGNENANGAPATILLVREKKNESNK---SSFDKMLEAKESKN
```

### Spt16\_N Lobe

### Spt16N\_Peptidase M24

```
P.t._SPT16-1 124 G---NNYRLAALNSIGQKSPFITENQFID----QNHLIKVDCSFKELINNDNKDIFBYINTCGKINSYMKF-MSQR
T.t._SPT16 127 -----FNIQTLAKEQQVGFMTMDSFKD---KNQYKFAADCISVVDCTSVKQNEISYIGKAKVSYVLESK-LIKE
P.t._SPT16-2c 115 -----GKLGMPPTTQQAGSLATEWYDY-----KGWQIVDASQLISDVLAVKDDQEQEIQQSSQLTIRLFKK-LIKQ
P.t._SPT16-2a 115 -----VKLGMPPTTEKQAGSLAAEWYDY-----KGWQIVDANQLISDVLAVKDDQEQEIQQSSQLTIRLFKK-LIKQ
P.t._SPT16-2b 115 -----VKLGMPPTTEKQAGSLAAEWYDY-----KGWQIVDANQLIGDVLAVKDDQEQEIQQSSQLTIRLFKK-LIKQ
A.t._SPT16 151 GDGNDSQVVGHIAREAPEKLEIETWTERK---NANQFVDITGGISDIFAVKDDTEVMSVKKAAAYLAYSVMKNVVPN
S.p._Spt16 131 -----KKGCVFPPKDKTQCKEINWDSIFEPV---KSEFNLDVDSLGLAKCLAIKDEQELANIKGASRVSVAVMSYFYDE
S.c._Spt16 129 -----KTVGIPKESYQCKEINWDSIFEPV---KSEFNLDVDSLGLAKCLAIKDEQELANIKGASRVSVAVMSYFYDE
C.e._SPT16 130 -----GDVGNFVKEKFSSEFVSWNKALE---EGGVNKNVDVLAFTHEFAVKDDKEMDLIRKSAQATASWTA-ARAR
D.m._Dre4 132 G----KRGVFAKDAYPEFSEAWKKSIT---ASKFEHVDISTLIAYLMCPKDESENNIRKASLVMDIFNKYIKDE
H.s._SPT16H 131 G----KKGCVFSPKDKFPKESVSWNDCLN---KEGFDKIDISAVVAYTIAVKEDGELNLMKKAASITSEVFNKFFKER
M.m._Supt16 131 G----KKGCVFSPKDKFPKESVSWNDCLN---KEGFDKVDISAVVAYTIAVKEDGELNLMKKAASITSEVFNKFFKER
```

### Spt16N\_Peptidase M24

```
P.t._SPT16-1 196 IELATKFNENTTNYSTIQAVKREKSSDLNQMATRRKFGI-----Q-GNYDLS-STVQSGGOYNSASE-STQSRV
T.t._SPT16 197 IETIIEDEGKTHSQTATMEGLIENEKELKKTSEEIGG-----ESDNLDAVVPVQSGGKYDLKPNACNEDILS
P.t._SPT16-2c 182 IEDSIDVGTTRITHQDLAKKVEQSLNDKQ--KVIKDIGI-----QDGLYDFAYTPIIQSGGNY--QVVDGPNKDYLS
P.t._SPT16-2a 182 IEDSIDVGTTRITHQDLAKKVEQSLNDKQ--KVMKEIGI-----QDGLYDFAYTPIIQSGGNY--QVVDGPNKDYLS
P.t._SPT16-2b 182 IEDSIDVGTTRITHQDLAKKVEQSLNDKQ--KVMKEIGI-----QDGLYDFAYTPIIQSGGNY--QVVDGPNKDYLS
A.t._SPT16 227 LESALDEKRDVTHSALMDLTEKALEPPTK---ASVKL-----KPENVDICYPPIQSGGKEDLKPASANNDELIT
S.p._Spt16 203 LSTYIDQGKKTTHSKFSQVESLIDNEAFFQTKSLKIGDI-----DLDQLEWCYTPPIQSGGKYDLKPSAIDDRNLH
S.c._Spt16 202 MVRVDEELKITTNAKLSKLENKIDDVKFLKQISPDISALCPPNYKFNFDLIDWTYSPIIQSGGKEDLKVARSNTDQY
C.e._SPT16 199 YVEIIDQEKVRHSLVLSNEFAAFKDKSV-----QQAAL-----AKYEADTCYDPIVMSGGNYSFKNHSESSESHLH
D.m._Dre4 203 IMDIIDSRRKVKHNLKSICEAAIGEKKY-----TSGI-----DPRLDMAYPPIIQSGGAYSLKPSAVADKNPLH
H.s._SPT16H 202 VMEIVDADKVRHSLKLAESVEKALEEKKY-----LAGA-----DPSTVEMCYPPIIQSGGNYNLKPSVSVSDKNHMH
M.m._Supt16 202 VMEIVDADKVRHSLKLAESVEKALEEKKY-----LAGA-----DPSTVEMCYPPIIQSGGNYNLKPSVSVSDKNHMH
```

## Spt16N\_Peptidase M24

```
P.t._SPT16-1 265 GD---VVIYSFCCQYMQSQSYCTRTLLFOENQLEQIYRVVILNVAFAFG-LVKEDIQFKQTYRETQNWETIFKDDPEM
T.t._SPT16 269 YD---TITVSVGTIKYMEYHANIVRTLLFDPTNDOKKIYORVYELQNCITAV-QLKPGIKLKTIVYENAVNFIN---EKVFEQL
P.t._SPT16-2c 250 SD---VIIISLGTQVNEYNNINCRITLFINPTEVOKKLYNTIIEVQSKIITG-LLTVGTPLNQVYKEAVPLIQ---QKIQELI
P.t._SPT16-2a 250 SD---VIIIQGLGTQVNEYNNINCRITLFINPTEVOKKLYNALLEVQSKIIT-LLMTIGVSLNVVVKESLQLIQ---YKLOEEL
P.t._SPT16-2b 250 SD---VIIIQGLGTQVNEYNNINCRITLFINPTEVOKKLYNALLEVQNKIIT-LLMTIGTTLNSVKEALQLIQ---QKLOEEL
A.t._SPT16 294 YDPASITTCAVGARYNSYCSNVARTYLLIATSLQSKAYEVLLKAHEAAID-ALRSGRKNNTVYQAALSVE---KNAPPEF
S.p._Spt16 276 GD---VVICSLGFRYKSYCSNVGRTYLFDPDSEQOKNYSLVALQKKLFE-YCRDGAVIDGDIYTKILGLIR---AKRPDL
S.c._Spt16 282 GN--GCTLASCCIRYNNYCSNITRTFLIDPSEEMANNYDFLLTQKEIWTNLLKPGRTPKVYVESVLEYE---KTKPEL
C.e._SPT16 265 SQ-FGTIITTSFGARLSEYCNITRTMLIIPSSLETA YEALIAELAVIA-ALKPGAKLSVYKIGIDTIT---EKSEPKL
D.m._Dre4 269 FG---VIVCSLGARFKSYCSNISRTFLINPTEAMQENYTFLLVYQEEELK-LLVVGTKLGDVYKTLDFVYK---KKEPSM
H.s._SPT16H 268 FG---AITCAMGIRREKSYCSNLVRLMVDPSQEVQENYVFLQLQEEELK-ELRHGVKICDVENAVMDVVK---KQKPEL
M.m._Supt16 268 FG---AITCAMGIRREKSYCSNLVRLMVDPTQEVQENYVFLQLQEEELK-ELRHGVKICDVENAVMDVVK---KQKPEL
```

## Spt16N\_Peptidase M24

```
P.t._SPT16-1 341 ---KMKFP-TDIGMLIG----SOMITDNHNIE-TIQDRMAVVRMFDVNLVQLPFYPERTNIALCLADTIFV---VSG
T.t._SPT16 342 ---KDKIP-ANFGGIGLEFRESNLYINAKNEK-EVEEGMVFNVVGFNLIQSE----KPKAYALQISDITVAI-RKQNT
P.t._SPT16-2c 323 NITNVQLP-SSFSGYIGLELKEPFLAISBKSTH-LVAKNEVYFVQVTLNLSNGQ---KGISYTIISVGDVIVV---TNG
P.t._SPT16-2a 323 NLQNLQLP-TSFGYIGLELKESSHTINBKSTH-VVTKGEVYFVNVVSLNENQNGQ---KNITYTIVQGVIVVI---TNG
P.t._SPT16-2b 323 NLLNLQLP-NSIGYIGLELKESSLVINBKSTH-VVAKGEVYFVNVVVMENVPNGQ---KNIVYTIQVGDVIVVI---TNG
A.t._SPT16 370 ---VDKLT-KSAGTIGLEFRESGLINAKNDK-VLRPKMAFNVSIGFONLECESESRSKKNKESILLADTVLV---TDQ
S.p._Spt16 349 ---EPNFV-RNIGAGIGLEFRESLLVNAKNPR-VLQAGMTLNSIGFGNLIINPHPKNSQSKEYALLIDITIQI---TRS
S.c._Spt16 357 ---VPNFT-KNIGSLIGLEFRDSNFINVKNKYRKRQRGDCFNISFGFNLLKDSQ---SANNYALQLADTVQIPLDETE
C.e._SPT16 340 ---AETLNKKEIGFATGIEFRESRLAISAKCDE-VVKAQMVFIYVIGVSTIPNKN-KGEGKPKPAALATSDTIIV---KEEG
D.m._Dre4 342 ---VDNLP-KSFGFAMGLEFRENSLVIGPKQA-LLKKNMVFNIHVGI SNLTPPEATDKEGKNYALFIDGTIVLV---GEQS
H.s._SPT16H 341 ---LNKIT-KNIGFGMGIEFREGLVINSKNQY-KLKKGMVFSINIGFSDITNKEGKKPEEKTVALFIDGTIVLV---DEDC
M.m._Supt16 341 ---LNKIT-KNIGFGMGIEFREGLVINSKNQY-KLKKGMVFSINIGFSDITNKEGKKPEEKTVALFIDGTIVLV---DEDC
```

## Spt16N\_Peptidase M24

```
P.t._SPT16-1 408 IEDCVITKAEKEFTFVSYQPTTEEGE-----RFFK--STFQKNENS-DVHQSEITR---EQFEQAEELNKIKND
T.t._SPT16 411 PNAVMTFKVSKKYEDISYSHQDEGQDEEQEEEDDLKE--NIQDGRTRNAYHKNTTIVS-----EKERQKH--
P.t._SPT16-2c 394 AANVTNSPKAYKQISYQIQEEDQPAQKQ---QFKQ--TDAPKEGRTRAPRNQQLIQIR-----ENKQRQIH--
P.t._SPT16-2a 394 ATTITQQPKAYKQISYQIQEEDPERKP---AFVQ--TDKDKPIRAR-PRNQQLIQIR-----ENKQRQIH--
P.t._SPT16-2b 394 AATITQQPKAYKQISYQIQEEDPERKP---AFVQ--TDKDKPIRAR-PRNQQLIQIR-----ENKQRQIH--
A.t._SPT16 442 KPELLTK-CSKSVKDVAVSFKDEDEE-----KPK--KARTSGSENY-TTKTALRS D---HVVSKELERKQH--
S.p._Spt16 421 DPIVFTD-SPKAQGDISYFFGEDSSLEDGV----KPK--PPTRGATISSHGKTRSET--RDLDSDAEKRREVEH--
S.c._Spt16 429 PPRFITN-YTKAKSISYFNNEEDDNNKKS---SPAT--KVPSPKPDNSKILRTKLRGEARGAEDAQKEQIRKEN--
C.e._SPT16 413 DNEITTEKAKSRLSNVIFKKEEQENRAEKD---NDQK--KMLGRGQRSV-VLTDQTRNKT-----TNEELRKRER--
D.m._Dre4 415 PASVMTSP-SKKKIKNVGIFIKDSDDEEDVDDKKTAKEDQGTILGRSKRNA-VLESKLRNEI-----NTEERKREH--
H.s._SPT16H 414 PATVITS-VKKKVKNVGIFIKNEDEDEEEEEK---DEAE--DLGRGSRAA-LLTERTRNEM-----TAEKRRFAH--
M.m._Supt16 414 PATVITS-VKKKVKNVGIFIKNEDEDEEEEEK---DEAE--DLGRGSRAA-LLTERTRNEM-----TAEKRRFAH--
```

## Spt16D

```
P.t._SPT16-1 471 QEKLEIKQYELVRLNDQ--TRQEPKLLVKDQLQAEQKEDQFDQ---YPKGELAVDQDKSAALIPITGTHYPFHALT
T.t._SPT16 478 QLELREVKLKELQBFYNNNGFLSNKINSRALELDKVQCYGGPQDTPKE--YKKNQTHIDAAHNAALLPVNGELVPPHISL
P.t._SPT16-2c 459 QEKLAQKQNELEORLEQDQFVQNSQETRALELDKLLQCYQKSEQYKPE--LQKQIYIDNQKCAVLPVLMGTHYPPHVS
P.t._SPT16-2a 457 QEKLAQKQTELEORLEQDQFVQNSQEVRALELDKLLQCYQKSEQYKPE--LQKQIYIDNQKCAVLPVLMGTHYPPHVS
P.t._SPT16-2b 457 QEKLAQKQTELEORLEQDQFVQNSQEVRALELDKLLQCYQKSEQYKPE--LQKQIYIDNQKCAVLPVLMGTHYPPHVS
A.t._SPT16 504 QAELARQKNEETARELAGDSSGAGDSRSTAKTSADVAVYKVNNDMPHK---ELMTQVDTRNEAVLLPIYGSIVPFHVAI
S.p._Spt16 489 QKQLASRQAECLQFAQGSVPSSGIEKP--TVKRFESYKRDSDQLPQA--IGELRILVDYRAQSILPLIFGRPVPFHIS
S.c._Spt16 501 QKKLHEKLEKNCLLRFSAADA-NGPDSEPRQYFKNYESYVRDSQLPTN--IRDLRTHVVDKWSQTIILPLIFGRPVPFHIS
C.e._SPT16 478 QKELGVQLNELAKARLSKGGGTDEKKS---KSNVSYKTEERFQADVQKMLIFVDRKYDSVVPVIFGIPVPFHISM
D.m._Dre4 484 QRELAQQLNERAKDRLARQNSGKVEKVR---KNTVSYKSIQMPREPEVKEKRYVDKRYETVIMPVFGIATPFHIS
H.s._SPT16H 478 QKELAAQLNEAKRRLTEKGEQIQKAR---KSNVSYKNSLMPKEPHIREMKIYIDKRYETVIMPVFGIATPFHIAI
M.m._Supt16 478 QKELAAQLNEAKRRLTEKGEQIQKAR---KSNVSYKNSLMPKEPHIREMKIYIDKRYETVIMPVFGIATPFHIAI
```

## Spt16D

|               |     |                                                                                  |
|---------------|-----|----------------------------------------------------------------------------------|
| P.t._SPT16-1  | 546 | IQNVSVKELPNGAGEITIRFWTNEFHID---TR-EFFSM-DQDMFLKEITLRNQEFIK-----LQDENEINVCRD      |
| T.t._SPT16    | 556 | IKNVSKNDEGKT-HTLRLEHNPSSGSSN-LANI-TFFPKI-DQIVFIKELTFRSKN-----AKNMLETIFKIKD       |
| P.t._SPT16-2c | 537 | IKNMG-----SSIRINFFSETTAG---QI-QFPQI-DCETTFIKELQYRSK-----SDRPNLILQIKQ             |
| P.t._SPT16-2a | 535 | IKNVSKIDEGKMGSSIRINFFSETTAG---QI-QFPKV-DCETTFIKELQYRSK-----SDRPNLILQIKS          |
| P.t._SPT16-2b | 535 | IKNVSKIDEGKMGSSIRINFFSETTAG---QI-QFPKV-DCETTFIKELQYRSK-----SDRPNLILQIKS          |
| A.t._SPT16    | 580 | IRTVSGNQITNRNCYIRITFENVPGTFPNPHDSN-SLKNQ-GAI--YIKVSVFRFKD-----SRISSEVTQQIKT      |
| S.p._Spt16    | 565 | LKNASKNDEGNF-VYLRLENFVSPGQIGGKDEL-FFEDP-NAQ--FIRSFTRSSN-----NSRMSOVFKDIQD        |
| S.c._Spt16    | 578 | YKNGSKNDEGEY-TYLRLENFSPGSSGSIKKEELFYEESADNQFVRSITLRSK-----GDRMSETFKQIAD          |
| C.e._Spt16    | 554 | IKNCSQSVEGDF-TYLRINFATPGSQVQK-DISG-QFPH-LAH--YMKELTFRASNIKDHSDSTAPSHNISTAFRLIKE  |
| D.m._Dre4     | 560 | IKNCSQSVEGEY-TYLRINFHPGATMGRNEGG-LYFQP-EAT--FVKEVTYRSNVEKE-HGEVGAPSANLNNAFFRLIKE |
| H.s._SPT16H   | 554 | IKNCSMSVEGDY-TYLRINFYCPGSAIGRNEGN-IFPNP-EAT--FVKEVTYRSNIKA-PGEQTPALNLQNAFFRLIKE  |
| M.m._Supt16   | 554 | IKNCSMSVEGDY-TYLRINFYCPGSAIGRNEGN-IFPNP-EAT--FVKEVTYRSNMKA-PGEQTPALNLQNAFFRLIKE  |

|               |     |                                                                                  |
|---------------|-----|----------------------------------------------------------------------------------|
| P.t._SPT16-1  | 613 | DARKQIEKQLEVDKFDFTIEKLVLPKN--TE-CLSKVYMRPTQSQKTRSPGFEVCEHENGFRVKS-ARGE-VLDFTT    |
| T.t._SPT16    | 621 | LQAKVVKQTDQEAANKDELVEQDKLQI-RNTKRP-ALRNKVRPATSK-QKVN-CMLELHNGFRVMT-TNE-KVDVIFK   |
| P.t._SPT16-2c | 593 | LQKVKVKAEOQVEREKQHVGELEPLIVSKSGRKP-IFKDLKVRPTFGS-GAA-CILEVNSNGFRVH-SNKE-QLDIVFK  |
| P.t._SPT16-2a | 599 | LQKVKVTEQOVEREKQNVGEMPELILNKGGKRP-IFKDLKVRPTFGS-GAA-CILEVHTNGFRVIH-SNKE-QLDIVFK  |
| P.t._SPT16-2b | 599 | LQKVKVTEQOVEREKQNVGETEPLILNKGGKRP-IFKDLKVRPTFGS-GAA-CILEVHTNGFRVIH-SNKE-QLDIVFK  |
| A.t._SPT16    | 645 | LRQVMARESERAEFATLVTQEKQLQAGNFKPLRLSELWIRPFPFSGRKKIP-CILEAHANGFRYST-TRPDERVDVLEA  |
| S.p._Spt16    | 629 | MKKAATKRETERKEFADVIEDKLEIKNKRPA-HINDVYVREPADG-KRIP-CTEIHONGIRYQSPRSDSHIDLLFS     |
| S.c._Spt16    | 646 | LKKEATKREQERKALADVQODKLEIKNKRPA-HINDVYVREPADG-KRIP-CTEIHONGIRYQSPRSDSHIDLLFS     |
| C.e._SPT16    | 628 | VQKRYKTRAEEREKEGIVKODLILSONKGNP-KLKDLYIRPNTIQ-KRIT-GSLEAHNGFRVTS-VRGD-RVDILYN    |
| D.m._Dre4     | 634 | VQKRYKTRAEEREKEDLVKODLILSONKGNP-KLKDLYIRPNTIV-KRMT-GSLEAHNGFRVTS-VRGD-RVDILYN    |
| H.s._SPT16H   | 628 | VQKRYKTRAEEREKEGIVKODSLVINLNRSNP-KLKDLYIRPNTIAQ-KRMQ-GSLEAHVNGFRVTS-VRGD-RVDILYN |
| M.m._Supt16   | 628 | VQKRYKTRAEEREKEGIVKODSLVINLNRSNP-KLKDLYIRPNTIAQ-KRMQ-GSLEAHVNGFRVTS-VRGD-RVDILYN |

|               |     |                                                                                 |
|---------------|-----|---------------------------------------------------------------------------------|
| P.t._SPT16-1  | 688 | SIKHCFVSPFEDVIACTHFIKMPKCKIMFSQIQFYRDIEGASEQEAAR-----RKVRLFDIDHVF-DKKVQDRRL     |
| T.t._SPT16    | 695 | NIKHALFQPCDNEMIVAHFNLNKPIKIMGKVVWVQVQYTEAGLPPEDLN-----NRRRGHVYDELEEQMEKARRK     |
| P.t._SPT16-2c | 668 | NIKHYIYQSEFQDIIAALHFHLSPIVIGKRRKTHDVQFYCEVGGAVEHEBGR-----RKNNKNDDLEEEERLVRHRK   |
| P.t._SPT16-2a | 674 | NIKHYIYQSEFQDIIAALHFHLSPIVIGKRRKTHDVQFYCEVGGAVEHEBGR-----KKTNRNDEDELEEEERLVRHRK |
| P.t._SPT16-2b | 674 | NIKHYIYQSEFQDIIAALHFHLSPIVIGKRRKTHDVQFYCEVGGAVEHEBGR-----KKTNRNDEDELEEEERLVRHRK |
| A.t._SPT16    | 723 | NIKHAFFQPAEKEMITLHFHLLHNMIMVGTKKTQDVQFYVEVMQVQSLGG-----GERSAYDPDEIDEQERDRKN     |
| S.p._Spt16    | 706 | NMKHLFQPCGEGELIVLIHVLKAPIMVGGKRRKQDVQFYREVSQIQFDETCNKK----RKYMYGDEDELEEQEERRRRA |
| S.c._Spt16    | 723 | NIKHLFQPCGEGELIVLIHVLKAPIMVGGKRRKQDVQFYREVSQIQFDETCNKK----RKYMYGDEDELEEQEERRRRA |
| C.e._SPT16    | 703 | NIKHAFFQPCDNEMITLHFHLLKPNVWGGKRRKQDVQFYTEVGEITTDLG-----KYHMDRDDLEEQEERRRRA      |
| D.m._Dre4     | 709 | NIKSAFFQPCDGEMITLHFHLLKVAIMVGGKRRKQDVQFYTEVGEITTDLG-----KQHMHRDDLEEQEERRRRA     |
| H.s._SPT16H   | 703 | NIKHALFQPCDGEMITLHFHLLKNAIMVGGKRRKQDVQFYTEVGEITTDLG-----KQHMHRDDLEEQEERRRRA     |
| M.m._Supt16   | 703 | NIKHALFQPCDGEMITLHFHLLKNAIMVGGKRRKQDVQFYTEVGEITTDLG-----KQHMHRDDLEEQEERRRRA     |

## Spt16M\_Rtt106

|               |     |                                                                                  |
|---------------|-----|----------------------------------------------------------------------------------|
| P.t._SPT16-1  | 761 | EELKNESEFQQSEIQY----YKRFNIFERLEIQYSFCNYAERVVFQPTQSCLVNIVDQPFITLLENVDIMCCERV      |
| T.t._SPT16    | 767 | KLNKDFEAFYKEVENQ-----LGDKIKFVPPYANLGFYGSFSRSTCLLOPTQNTLMNIIEFPFFLMSLEVEVACFERM   |
| P.t._SPT16-2c | 742 | KVAREFEVFTKTEEL-----GADYKIQFEKPPFDLGFECNWNRARLFLOPTRDRLMNVVESPFFLITLSEVEICCFERI  |
| P.t._SPT16-2a | 748 | KVAREFEVFTKTEEL-----GADYKISFEKPPFDLGFECNWNRARLFLOPTRDRLMNVVESPFFLITLSEVEICCFERI  |
| P.t._SPT16-2b | 748 | KVAREFEVFTKTEEL-----GADYKISFEKPPFDLGFECNWNRARLFLOPTRDRLMNVVESPFFLITLSEVEICCFERI  |
| A.t._SPT16    | 796 | KINMDFNHFAANRYNDMQLPQFASLDIEFQPLRELGFHGVPHKTSAFITPTSSCLVELTEYPTLVVSLSETEIYNLERV  |
| S.p._Spt16    | 782 | QLDREFKSAEKTAEA-----SEGRTELIPFRELAFNGVFRSNVLLOPTDCLVQLTDTPTPTVITLNEIETAHLERV     |
| S.c._Spt16    | 803 | ALDKREFKYADATAEA-----SNGLTVENTFRDLGFQCVENRSVAVFCMPTDCLVQLTEPPELVINLEVEICILERV    |
| C.e._SPT16    | 775 | RLNAAFNSICEKVSRL-----INDQVEFESPFAGLGFQCVFYRSATTLKPTASCLVNLTEWPFITVITLSEVELVHFERV |
| D.m._Dre4     | 781 | KLKTAFKSCCEKVEFM-----IKSVVEFTPFRELGFQCAFVRSSTVITLQPTSGSLVNLTEWPFVITLSEVELVHFERV  |
| H.s._SPT16H   | 775 | KLKTAFKNFTEKVEAL-----KKELEFEVPPFDLGFECNWFYRSSTVITLQPTSSALVNATEWPFVITLSEVELVHFERV |
| M.m._Supt16   | 775 | KLKTAFKNFTEKVEAL-----KKELEFEVPPFDLGFECNWFYRSSTVITLQPTSSALVNATEWPFVITLSEVELVHFERV |
