# Supplementary material for: The Paramecium histone chaperone Spt16-1 is required for Pgm endonuclease function in programmed genome rearrangements
Source: PubMed Central journal article supplement (PMC7402521; doi:10.1371/journal.pgen.1008949), 2020-07-23

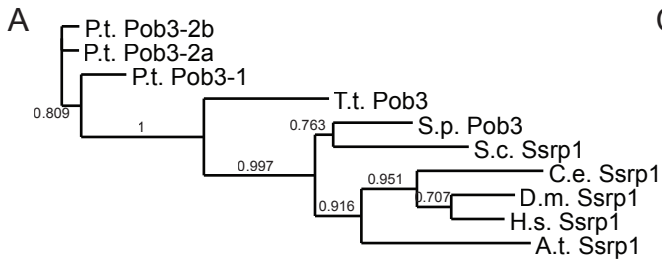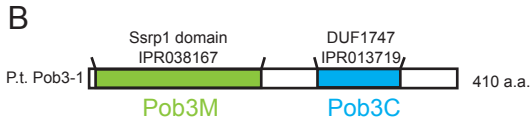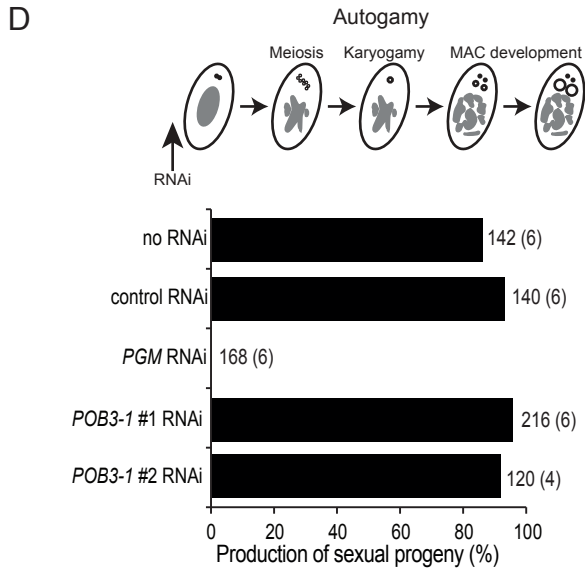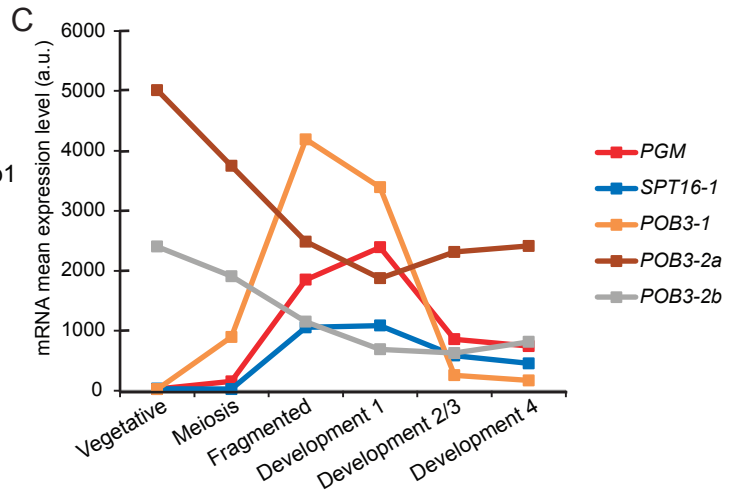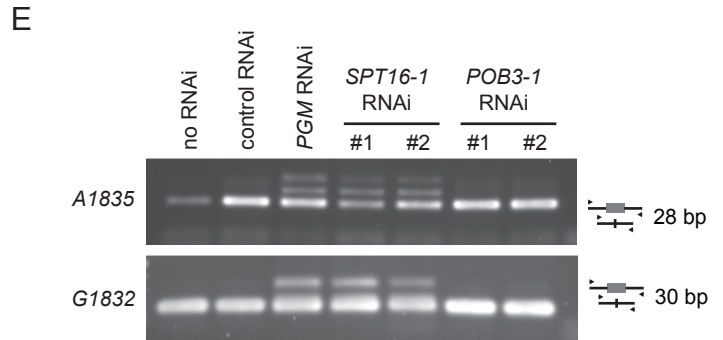

Supplement: pgen.1008949.s003.pdf [file pgen.1008949.s003.pdf]
